# Supplementary material for: Three CNGC Family Members, CNGC5, CNGC6, and CNGC9, Are Required for Constitutive Growth of Arabidopsis Root Hairs as Ca2+-Permeable Channels
Source: PubMed Central journal article supplement — Plant Commun. 2019 Sep 16;1(1):100001. doi: 10.1016/j.xplc.2019.100001 (PMC7748020; doi:10.1016/j.xplc.2019.100001), 2019-09-16
Supplement: mmc1.pdf [file mmc1.pdf]

## Supplemental Figures and Tables

### **Three CNGC Family Members, CNGC5, CNGC6 and CNGC9, Are Required for Constitutive Growth of Arabidopsis Root Hairs as Ca<sup>2+</sup>-Permeable Channels**

Yan-Qiu Tan<sup>1,2</sup>, Yang Yang<sup>1,2</sup>, An Zhang<sup>1,2</sup>, Cui-Fang Fei<sup>1,2</sup>, Li-Li Gu<sup>1,2</sup>, Shu-Jing Sun<sup>1</sup>,  
Wei Xu<sup>1</sup>, Lingling Wang<sup>1</sup>, Hongtao Liu<sup>1</sup> and Yong-Fei Wang<sup>1,\*</sup>

<sup>1</sup>National Key Laboratory of Plant Molecular Genetics, CAS Center for Excellence in Molecular Plant Sciences, Shanghai Institute of Plant Physiology and Ecology, Chinese Academy of Sciences, Shanghai 200032, P. R. China

<sup>2</sup>University of Chinese Academy of Sciences, Shanghai 200032, China

\*Correspondence author. Email: [wangyongfei@sibs.ac.cn](mailto:wangyongfei@sibs.ac.cn)

The supplemental file includes 8 Supplemental Figures and 2 Supplemental Tables.

## Supplemental Figure 1

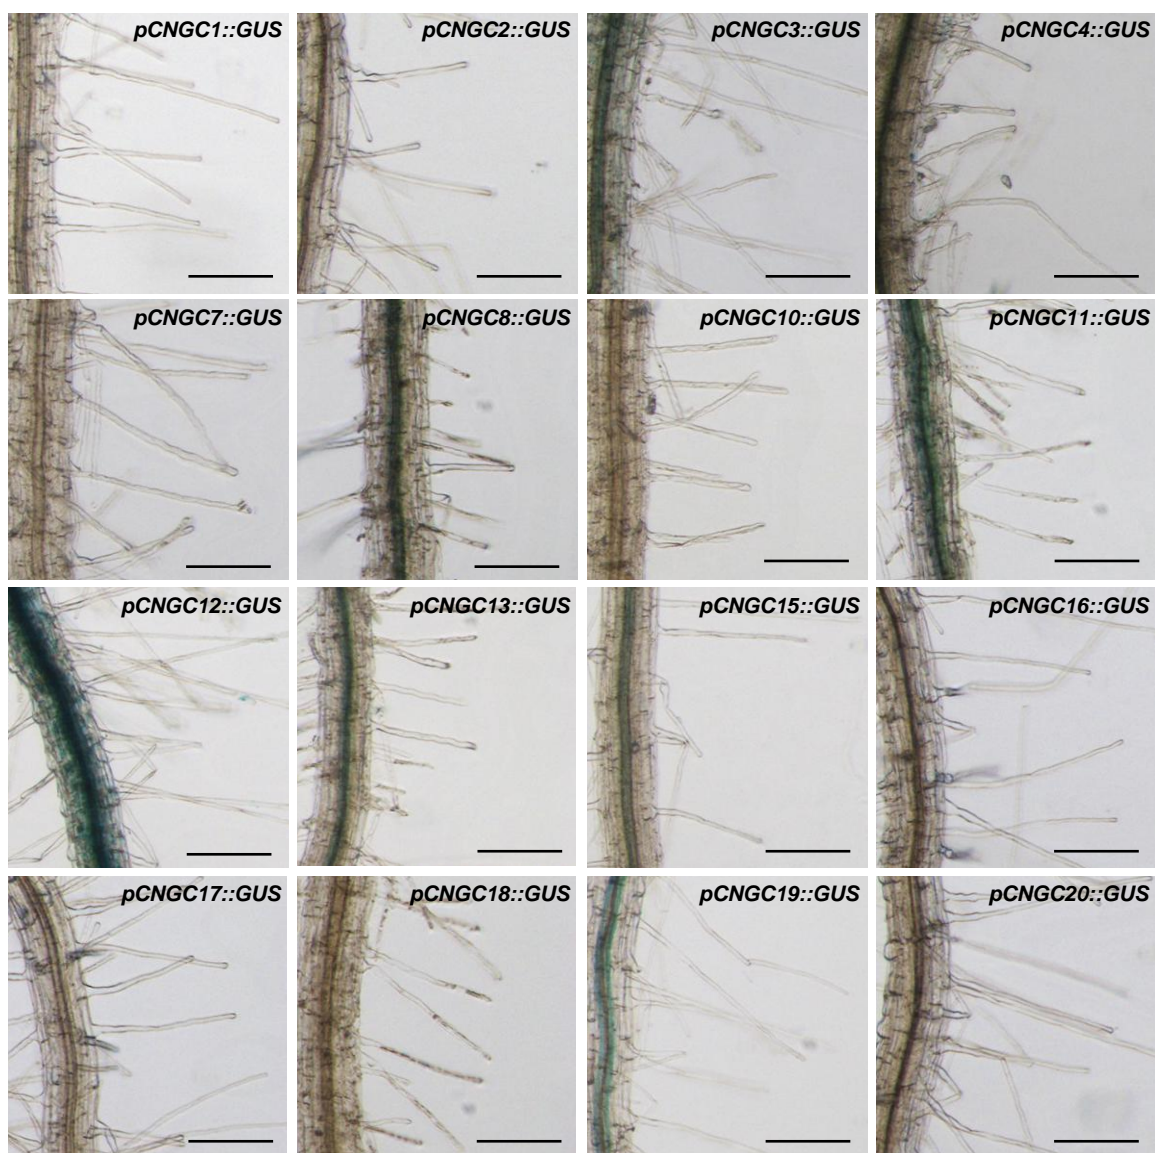

**Supplemental Figure 1.** GUS Staining Analysis for CNGC Members Except CNGC5, 6, 9 and 14 in Arabidopsis RHs. Scale bars equal to 0.1 mm.

## Supplemental Figure 2

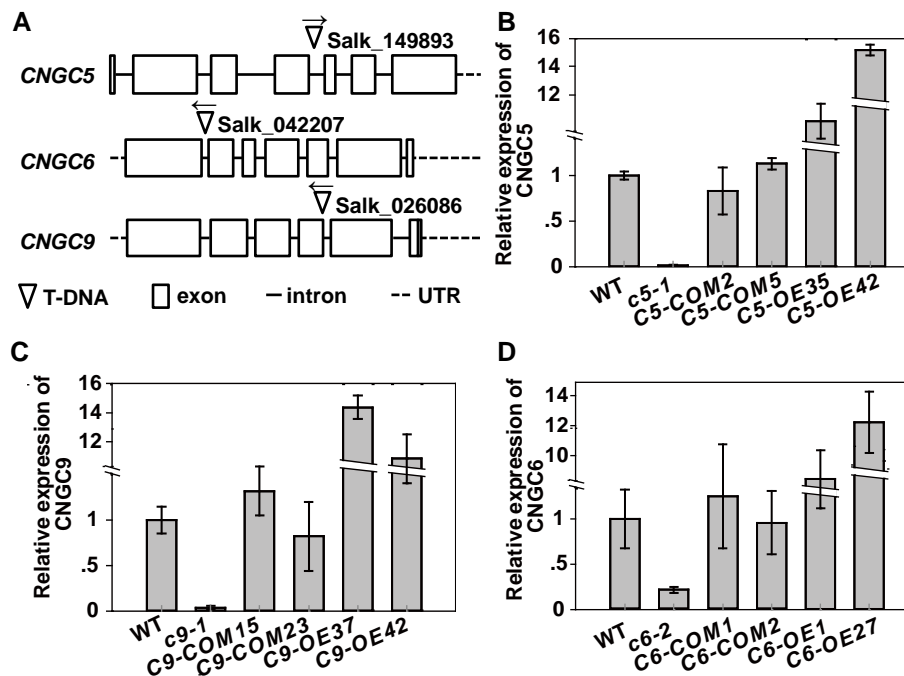

**Supplemental Figure 2.** qRT-PCR Analysis of *Shrh1* Mutant and Transgenic Lines in Arabidopsis. (Supports Figure 1.)

(A) Schematic models showing T-DNA insertion sites in *CNGC5*, *CNGC6* and *CNGC9*. (B) to (D) qRT-PCR analysis showing the relative expression levels of *CNGC5* (B), *CNGC9* (C) and *CNGC6* (D) in Arabidopsis plants. 3 biological replicates were conducted. Error bars depict means  $\pm$  SEM.

### Supplemental Figure 3

**A**

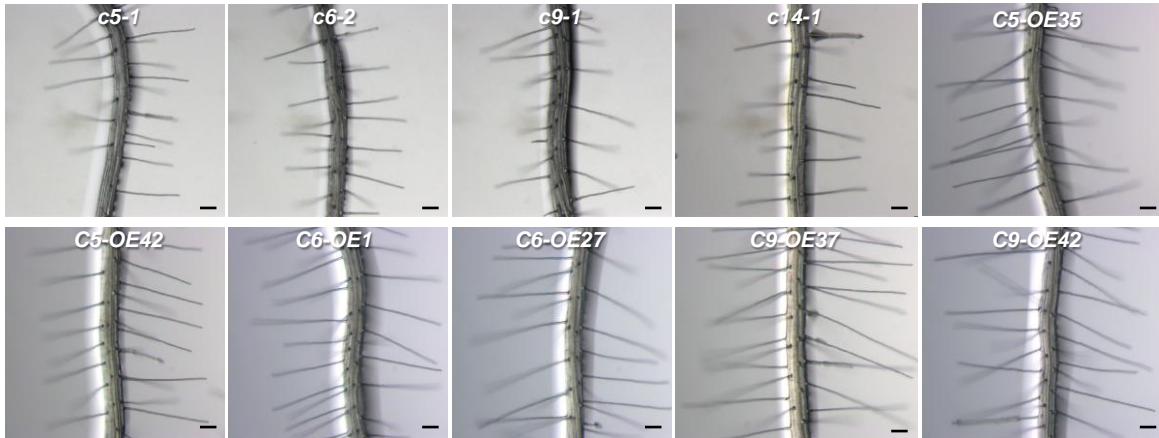

**B**

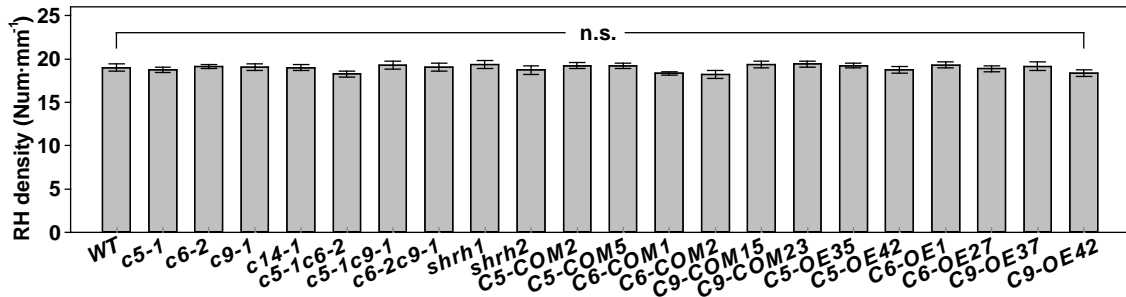

**C**

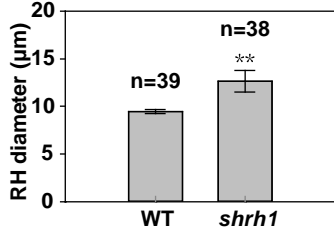

**D**

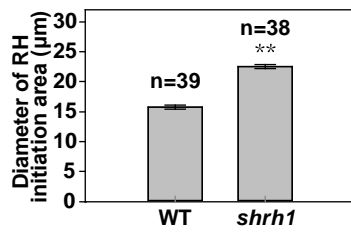

**E**

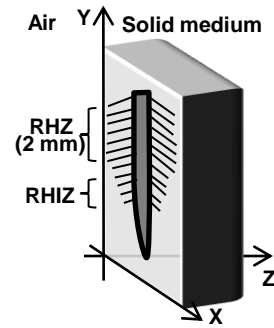

**Supplemental Figure 3. RH Phenotypic Analysis in Arabidopsis.**

(A) Images of typical roots and hairs of Arabidopsis plants. See Figure 1B for wild type. (B) Statistical analysis of RH density. (C) Average diameters of RH trunks close to RH tips. (D) Average diameters of RH initiation area. (E) Diagram showing RHZ for RH phenotypic analysis, including RH length, branching rate, rupturing rate and density, and RHIZ for time-lapse analysis of RH initiating and elongating growth. *c5-1*, *c6-2*, *c9-1*, *c14-1*, *c5-1c6-2*, *c5-1c9-1*, *c6-2c9-1*, *C5-COM2*, *C5-COM5*, *C6-COM1*, *C6-COM2*, *C9-COM15*, *C9-COM23*, *C5-OE35*, *C5-OE42*, *C6-OE1*, *C6-OE27*, *C9-OE37* and *C9-OE42* denote *cngc5-1*, *cngc6-2*, *cngc9-1*, *cngc14-1*, *cngc5-1cngc6-2*, *cngc5-1cngc9-1*, *cngc6-2cngc9-1*, *CNGC5-COM2*, *CNGC5-COM5*, *CNGC6-COM1*, *CNGC6-COM2*, *CNGC9-COM15*, *CNGC9-COM23*, *CNGC5-OE35*, *CNGC5-OE42*, *CNGC6-OE1*, *CNGC6-OE27*, *CNGC9-OE37* and *CNGC9-OE42*, respectively, for Supplemental Figure 1 and Figure 1. Scale bars equal to 0.1 mm in (A). No less than 30 roots and 200 RHs (7-10 RHs per root) were counted for RH density analysis, and n.s. denotes no significant difference between samples with  $P > 0.05$  (Kruskal-Wallis one-way ANOVA analysis) in (B). Letter n denotes the numbers of RHs analyzed for RH diameters, and \*\* denotes significant difference with  $P < 0.01$  versus wild type (Mann-Whitney Rank Sum Test) in (C) and (D). Error bars depict means  $\pm$  SEM.

## Supplemental Figure 4

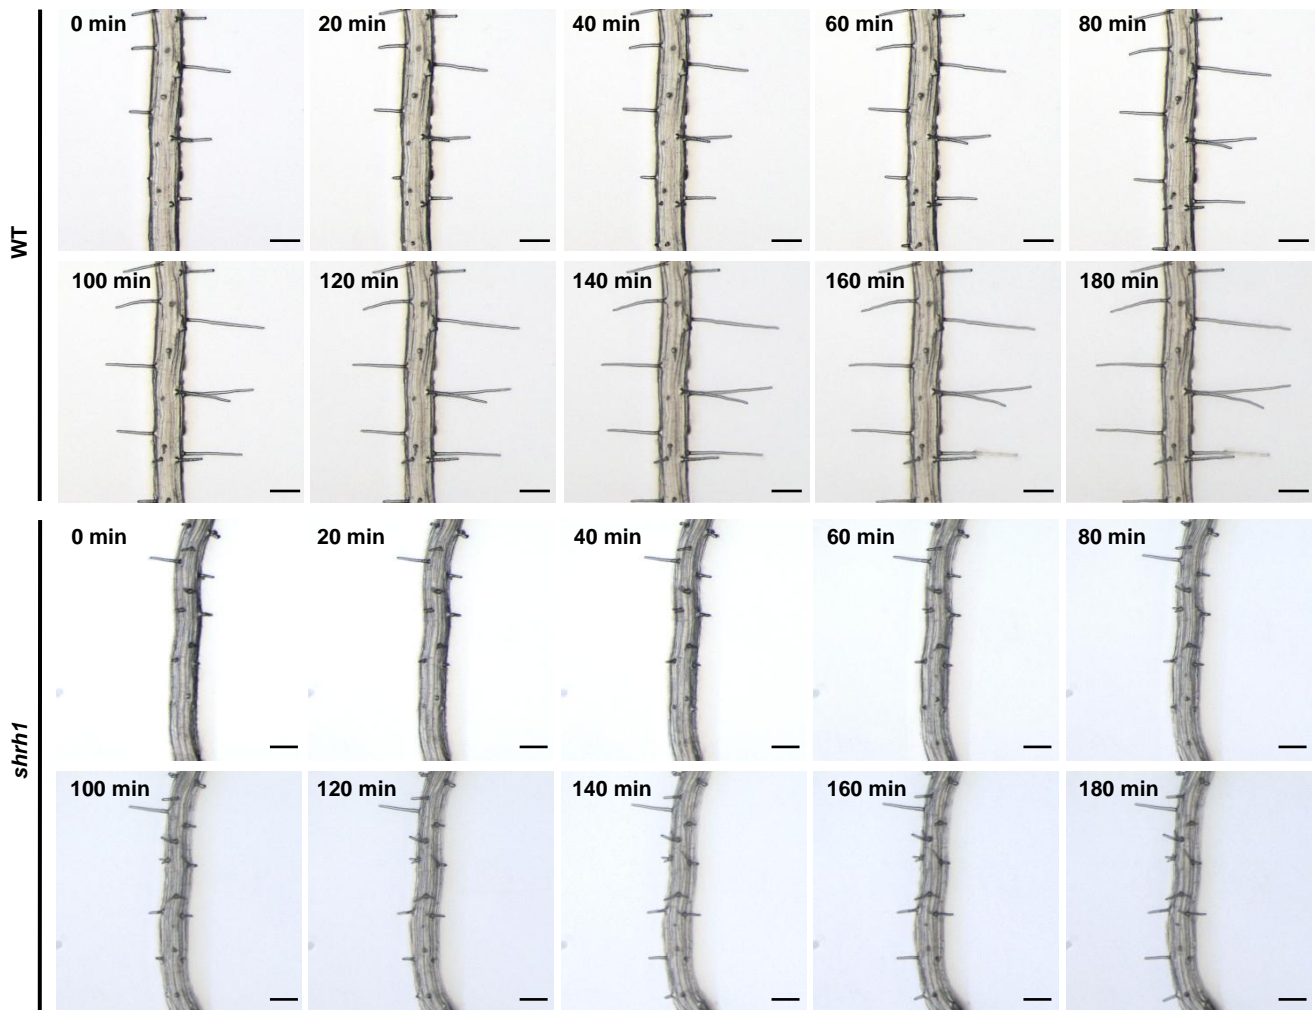

**Supplemental Figure 4.** Time-Lapses of RH Growth in Air in Arabidopsis. Merged pictures from a set of optical sections are shown. The step for optical section is 22.5  $\mu\text{m}$ . A set of optical sections is composed of 15 sections for *shrh1* and 21 sections for wild type. The numbers of roots tested are 7 for wild type and 4 for *shrh1* mutant. Scale bars equal to 0.1 mm.

## Supplemental Figure 5

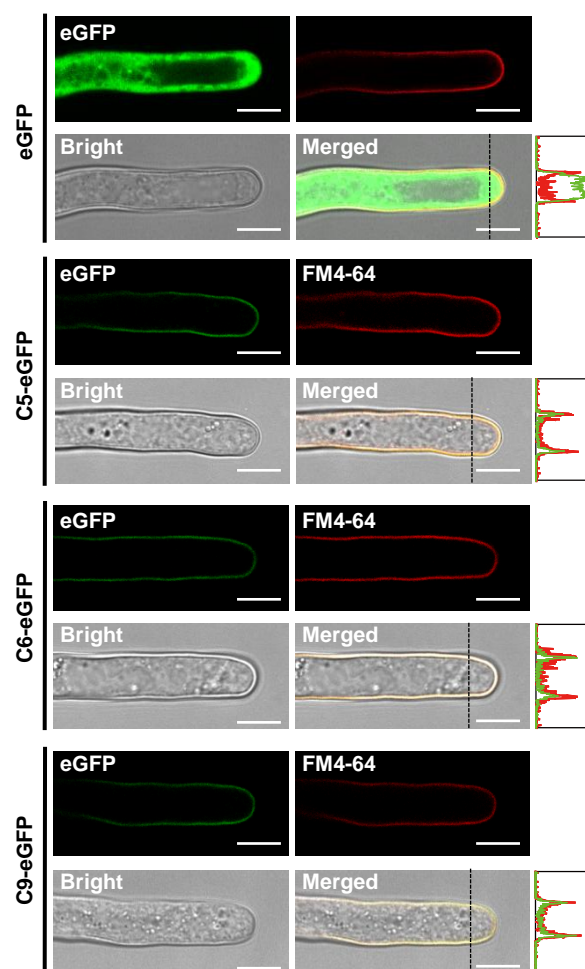

**Supplemental Figure 5.** CNGC5, 6 and 9 Are Localized in the Plasma Membrane of RHs. eGFP fluorescence, FM4-64 fluorescence, bright field, merged images and relative fluorescent intensity of eGFP (green) and RFP (red) along the dashed lines across the merged photos in RHs are shown. The number of RHs tested is 14 for CNGC5, 11 for CNGC6, 18 for CNGC9 and 15 for eGFP control. *C5-eGFP*, *C6-eGFP* and *C9-eGFP* denote *CNGC5-OE4*, *CNGC6-OE12* and *CNGC9-OE18*, respectively. Scale bars equal to 10  $\mu\text{m}$ .



## Supplemental Figure 6

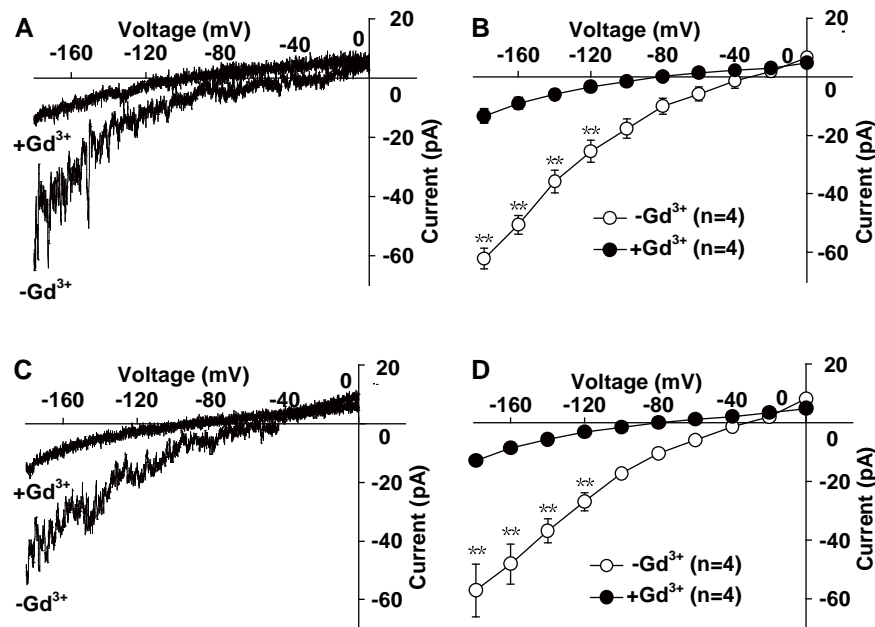

**Supplemental Figure 6.** Inward Channel Currents Recorded in HEK293T Cells Expressing either CNGC5 or CNGC6 Are Mainly Carried by Ca<sup>2+</sup>, Not Obviously by Na<sup>+</sup>. (A) and (B) Typical whole-cell recordings (A) and average current-voltage curves of steady-state whole-cell currents (B) recorded in HEK293T cells expressing *CNGC5*. (C) and (D) Typical whole-cell recordings (C) and average current-voltage curves of steady-state whole-cell currents (D) recorded in HEK293T cells expressing *CNGC6*. Letter n denotes the numbers of HEK293T cells tested, and \*\* denotes significant difference between Gd<sup>3+</sup>-free and +100  $\mu$ M Gd<sup>3+</sup> conditions at the same voltage with  $P < 0.01$  (Kruskal-Wallis one-way ANOVA analysis). Error bars depict means  $\pm$  SEM.



## Supplemental Figure 7

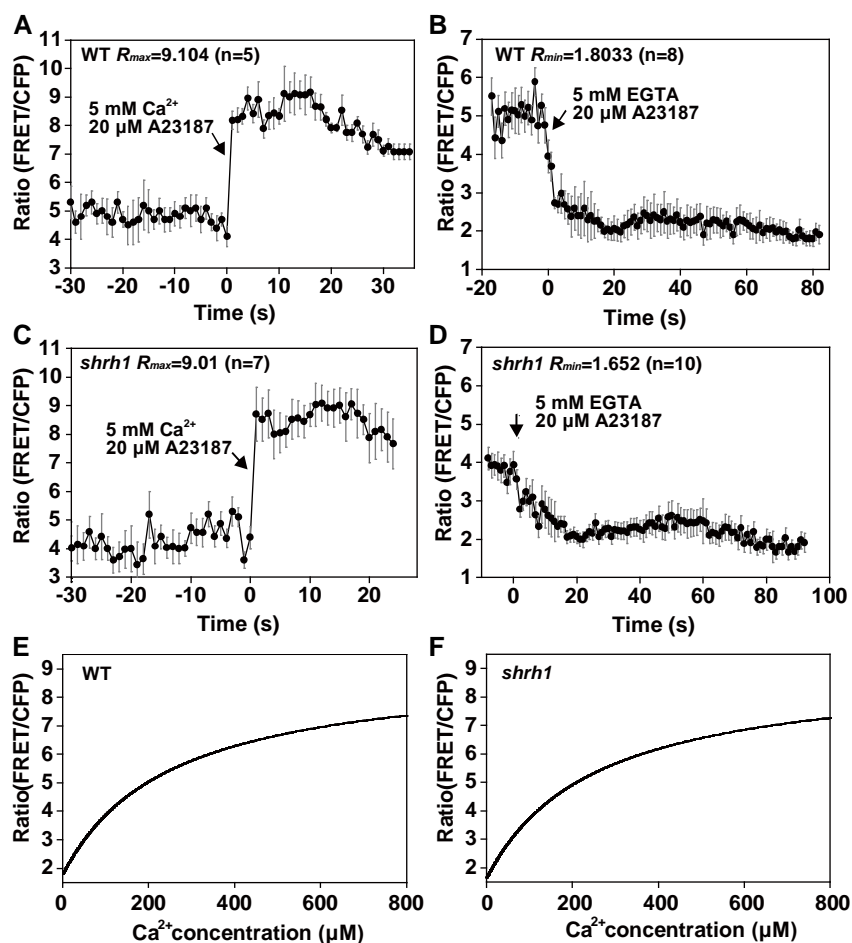

**Supplemental Figure 7.** *In vivo* Calibration of FRET/CFP Ratio of YC3.6 to  $[Ca^{2+}]$  in RHs.

Equation  $[Ca^{2+}] = (K_d[R-R_{min}]/[R_{max}-R])(F_{min}/F_{max})$  is used to analyze the cytosolic  $[Ca^{2+}]$  level as described in Material and Method. **(A)** and **(B)** Relative average FRET/CFP ratio of YC3.6 in wild type. **(C)** and **(D)** Relative average FRET/CFP ratio of YC3.6 in *shrh1* mutant.  $R_{max}$  was recorded upon the application of 20  $\mu M$   $Ca^{2+}$  ionophore Br-A23187 and 5 mM  $Ca^{2+}$  (**A** and **C**), and  $R_{min}$  was recorded upon the application of 20  $\mu M$  Br-A23187 and 5 mM EGTA (**B** and **D**). **(E)** and **(F)** Diagram of cytosolic  $[Ca^{2+}]$  level calibration in the RHs of wild type (**E**) and *shrh1* (**F**). Letter n denotes the numbers of RHs tested. Error bars depict means  $\pm$  SEM.

## Supplemental Figure 8

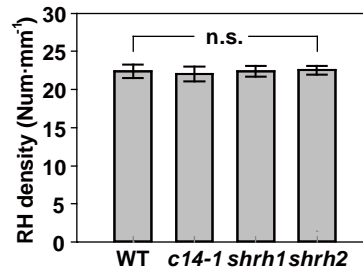

**Supplemental Figure 8.** Statistical Analysis of RH Density of RHs Embedded in Solid Medium.

No less than 30 roots and 200 RHs (7-10 RHs per root) were counted for each line. n.s. denotes no significant difference between samples with  $P > 0.05$  (Kruskal-Wallis one-way ANOVA analysis). Error bars depict means  $\pm$  SEM.

**Supplemental Table 1.** Relative Changes of RH Length and Branching.

| Genotype        | Treatment ( $\mu\text{M}$ ) | Relative changes of RH length (%) $\pm$ SE | Relative change of RH branching rate $\pm$ SE |
|-----------------|-----------------------------|--------------------------------------------|-----------------------------------------------|
| WT              | 0.05 IAA                    | + 37.43 $\pm$ 4.19                         | +13.68 $\pm$ 1.75                             |
| <i>shrh1</i>    |                             | + 33.24 $\pm$ 8.3                          |                                               |
| <i>C9-COM15</i> |                             | + 35.79 $\pm$ 3.63                         |                                               |
| <i>C9-OE42</i>  |                             | + 9.78 $\pm$ 2.13                          |                                               |
| WT              | 50 yucasin                  | -65.71 $\pm$ 1.4                           | -60.12 $\pm$ 7.3                              |
| <i>shrh1</i>    |                             | -69.51 $\pm$ 1.3                           |                                               |
| <i>C9-COM15</i> |                             | -66.2 $\pm$ 1.89                           |                                               |
| <i>C9-OE42</i>  |                             | -63.97 $\pm$ 1.64                          |                                               |

+ denotes increase, and – denotes decrease relative to control for the same genotype.

**Supplemental Table 2.** Restriction sites and primers for plant genotyping and vector construction.

| Primer name    | Sequence(5' to 3')                      | Use                                                                                  |
|----------------|-----------------------------------------|--------------------------------------------------------------------------------------|
| CNGC5-LP       | GAGCTTTCTGGTTAAGCCGTC                   | Genotyping of T-DNA insertion mutants                                                |
| CNGC5-RP       | CACGCTCCCTAAGATCTTGTG                   |                                                                                      |
| CNGC6-LP       | GTGGCAAGCCTTACTCCAACAGTCGTT             |                                                                                      |
| CNGC6-RP       | GAAGTATCAGAGAAGAAGATATTTGATCCACA        |                                                                                      |
| CNGC9-LP       | ATTTGCAGCAAACCTTGAAGC                   |                                                                                      |
| CNGC9-RP       | TGTTTATGGTGGGGACTTCAG                   |                                                                                      |
| CNGC14-LP      | TCGGAACAATTGGCAGAATAC                   |                                                                                      |
| CNGC14-RP      | CACCTGCTTGTAAGCAAAGG                    |                                                                                      |
| LBb1.3         | ATTTTGCCGATTTCCGGAAC                    |                                                                                      |
| pCNGC1-F-XbaI  | CTAG TCTAGA ATGAATCATGATAGAAATGAGCTGA   | Vectors for the generation of transgenic Arabidopsis lines for GUS staining analysis |
| pCNGC1-R-NcoI  | CATGCCATGG CCACGAAAGTCACAAACTTTTG       |                                                                                      |
| pCNGC2-F-XbaI  | CTAG TCTAGA ACTTTGGTCCCTACGGTTTTT       |                                                                                      |
| pCNGC2-R-NcoI  | CATGCCATGG AGTGATTGGGAGAGAGAAGAGTGAT    |                                                                                      |
| pCNGC3-XbaI-F  | TT TCTAGA GACCCTCTCAGGCCATTTGA          |                                                                                      |
| pCNGC3-NcoI-R  | CATGCCATGG CGCTGATTGTTTTCTTCCACAGAT     |                                                                                      |
| pCNGC4-F-SalI  | ACGC GTCGAC GTGAATGACCAAAAATTTAGGGA     |                                                                                      |
| pCNGC4-R-NcoI  | CATGCCATGG TTAATTATGAAGAAGAATTTTCT      |                                                                                      |
| pCNGC5-F-XbaI  | CTAG TCTAGA CTCCAAATCACAACAGAAGCGTT     |                                                                                      |
| pCNGC5-R-NcoI  | CATGCCATGG GATTGCTTACAAGGAATTCAGAACT    |                                                                                      |
| pCNGC6-F-SalI  | ACGC GTCGAC TATATATAAAGCAGTGGCACCAACC   |                                                                                      |
| pCNGC6-R-NcoI  | CATGCCATGG CTCTTTTAACTCATGAATCCTAAAAA   |                                                                                      |
| pCNGC7-F-XbaI  | CTAG TCTAGA AGCTAGAGATGTTGCTGGAAGCT     |                                                                                      |
| pCNGC7-R-NcoI  | CATGCCATGG TCCAGTCGCAGGAGAAGAACT        |                                                                                      |
| pCNGC8-F-XbaI  | CTAG TCTAGA ATTAAAACATCTGAAGATGTT       |                                                                                      |
| pCNGC8-R-NcoI  | CATGCCATGG TTGAAACCCTCGAATCTGTATCA      |                                                                                      |
| pCNGC9-F-XbaI  | CTAG TCTAGA GTCATGTTGAACCTTTGTGAAAGAAT  |                                                                                      |
| pCNGC9-R-NcoI  | CATGCCATGG GCTTTTTCTTGTGACTCAACTC       |                                                                                      |
| pCNGC10-F-XbaI | CTAG TCTAGA TTGTTCTCTTCTAAACCCAGCTT     |                                                                                      |
| pCNGC10-R-NcoI | CATGCCATGG CAGCCAAACCCTTGATATTTCA       |                                                                                      |
| pCNGC11-F-SalI | ACGC GTCGAC TTTGAAGGAGAGATCATTTTTGC     |                                                                                      |
| pCNGC11-R-NcoI | CATGCCATGG GTTTTTATCTGTCAATCTTCAATATTTT |                                                                                      |
| pCNGC12-F-SalI | ACGC GTCGAC TGCTCAAAAAGGTAACCTTTTATTT   |                                                                                      |
| pCNGC12-R-NcoI | CATGCCATGG TTAGTATATGTCGTCAATCTGCAATAT  |                                                                                      |
| pCNGC13-F-XbaI | CTAG TCTAGA GATCTCTTGCTTCTTAGACAGCTTT   |                                                                                      |
| pCNGC13-R-NcoI | CATGCCATGG GAGTCAAGCTTTTTTTTGCTATAACG   |                                                                                      |
| pCNGC14-F-XbaI | CTAG TCTAGA ACCATACAACAGCATAACTTTCCAG   |                                                                                      |
| pCNGC14-R-NcoI | CATGCCATGG GGCAAGTGCATTGAGAATTGTAT      |                                                                                      |
| pCNGC15-F-SalI | ACGC GTCGAC TTTCGATGAAGTGAACAATATCGTA   |                                                                                      |
| pCNGC15-R-NcoI | CATGCCATGG TCTTCTCTTTATCAAATCCTCTGAC    |                                                                                      |
| pCNGC16-F-SalI | ACGC GTCGAC GTTACTTTTGTCTGAAATCCATGAA   |                                                                                      |
| pCNGC16-R-NcoI | CATGCCATGG TTGGGGGTTGCGTGTGTT           |                                                                                      |
| pCNGC17-F-XbaI | CTAG TCTAGA AACCCAAAACCTGAACCCTATTTTAT  |                                                                                      |
| pCNGC17-R-NcoI | CATGCCATGG TAGAAGAAGCTCAAGCTCAAGCTC     |                                                                                      |
| pCNGC18-F-KpnI | GGGGTACC TAGGGTCCCAAATGATTAATATGTT      |                                                                                      |
| pCNGC18-R-EcRI | CC GAATTC TCTTCCATGGCGGATTCC            |                                                                                      |
| pCNGC19-F-SacI | CT GAGCTC TGTGAAAGTGGTCATCTCTCATCTT     |                                                                                      |
| pCNGC19-R-BmI  | TT GGATCC TTTTATTTTTCAGAAACCCAAAATCT    |                                                                                      |
| pCNGC20-F-SalI | ACGC GTCGAC TTTTTTCAGAGAGTTAAGAAATGCA   |                                                                                      |
| pCNGC20-R-NcoI | CATGCCATGG TCTTCTCTTCGTAGCCAGGT         |                                                                                      |

| Primer name   | Sequence(5' to 3')                     | Use                                                        |
|---------------|----------------------------------------|------------------------------------------------------------|
| eGFP-F-XmaI   | TCCC CCCGGG ATGGTGAGCAAGGGCGAGGAGC     | Vectors for the generation of COM and OE Arabidopsis lines |
| eGFP-R-XbaI   | CTAG TCTAGA CTTGTACAGCTCGTCCATGCC      |                                                            |
| pCNGC5-F-XmaI | TCCC CCCGGG CTCCAAATCACAACAGAAGCGTT    |                                                            |
| pCNGC5-R-XbaI | CTAG TCTAGA GATTGCTTACAAGGAATTCAGAACT  |                                                            |
| CNGC5-F-SalI  | ACGC GTCGAC ATGGCAGGGAAAAGAGAAAACTTTG  |                                                            |
| CNGC5-R-PstI  | AA CTGCAG GTCAGCAGTCAAATCAGGCTCAGGAG   |                                                            |
| pCNGC6-F-SacI | CT GAGCTC TATATATAAAGCAGTGGCACCAACC    |                                                            |
| pCNGC6-R-XmaI | TCCC CCCGGG ACTCTTTTAACTCATGAATCCTAAA  |                                                            |
| CNGC6-F-XbaI  | CTAG TCTAGA ATGTTTCGATACTTGTGGCC       |                                                            |
| CNGC6-R-PstI  | GC CTGCAG GTGATCTTCAGCAGAGAAA          |                                                            |
| pCNGC9-F-SacI | CT GAGCTC GTCATGTTGAACTTTGTGAAAGAAT    |                                                            |
| pCNGC9-R-XmaI | TCCC CCCGGG GCTTTTTCCTTGTGACTCAACTC    |                                                            |
| CNGC9-F-SalI  | ACGC GTCGAC ATGTTAGACTGTGGCAAAAAGC     |                                                            |
| CNGC9-R-PstI  | AA CTGCAG ACTAGTATCATCAGCAGAGAAATCAGG  |                                                            |
| CNGC5-qRT-F   | AGAAAATGGAAGAGGCAGAAGC                 |                                                            |
| CNGC5-qRT-R   | TCACCAAATCCCTAATCTTTGTGT               |                                                            |
| CNGC6-qRT-F   | ATAACACTTGCTATTGCTGGACT                |                                                            |
| CNGC6-qRT-R   | CAATGGAACCTTTCGGACTAACG                |                                                            |
| CNGC9-qRT-F   | ATTCAGATTCTACTCGCAACAA                 |                                                            |
| CNGC9-qRT-R   | CTTTGCTTCAATACGGTTCTT                  |                                                            |
| 18S-qRT-F     | CGGCTACCACATCCAAGGAA                   |                                                            |
| 18S-qRT-R     | TGTCACTACCTCCCCGTGTCA                  |                                                            |
| CNGC5-F-NheI  | TCTA GCTAGC ATGGCAGGGAAAAGAGAAAAC      | Vectors for transient expression of CNGCs in HEK293T cells |
| CNGC5-R-EcoRI | CC GAATTC GTCAGCAGTCAAATCAGGCTCAGGAG   |                                                            |
| CNGC6-F-NheI  | TCTA GCTAGC ATGTTTCGATACTTGTGGCC       |                                                            |
| CNGC6-R-EcoRI | CC GAATTC GTGATCTTCAGCAGAGAAA          |                                                            |
| CNGC9-F-XbaI  | CTAG TCTAGA ATGTTAGACTGTGGCAAAAAGC     |                                                            |
| CNGC9-R-SalI  | ACGC GTCGAC ACTAGTATCATCAGCAGAGAAATCAG |                                                            |
